# Supplementary material
Source: Elsevier journal article supplement (https://authors.library.caltech.edu/58275/2/mmc1.pdf)
Supplement: mmc1 [file mmc1.pdf]

**Molecular Cell, *Volume 36***

**Supplemental Data**

**The Incoherent Feedforward Loop Can Provide Fold-Change  
Detection in Gene Regulation**

**Lea Goentoro, Oren Shoval, Marc Kirschner, and Uri Alon**

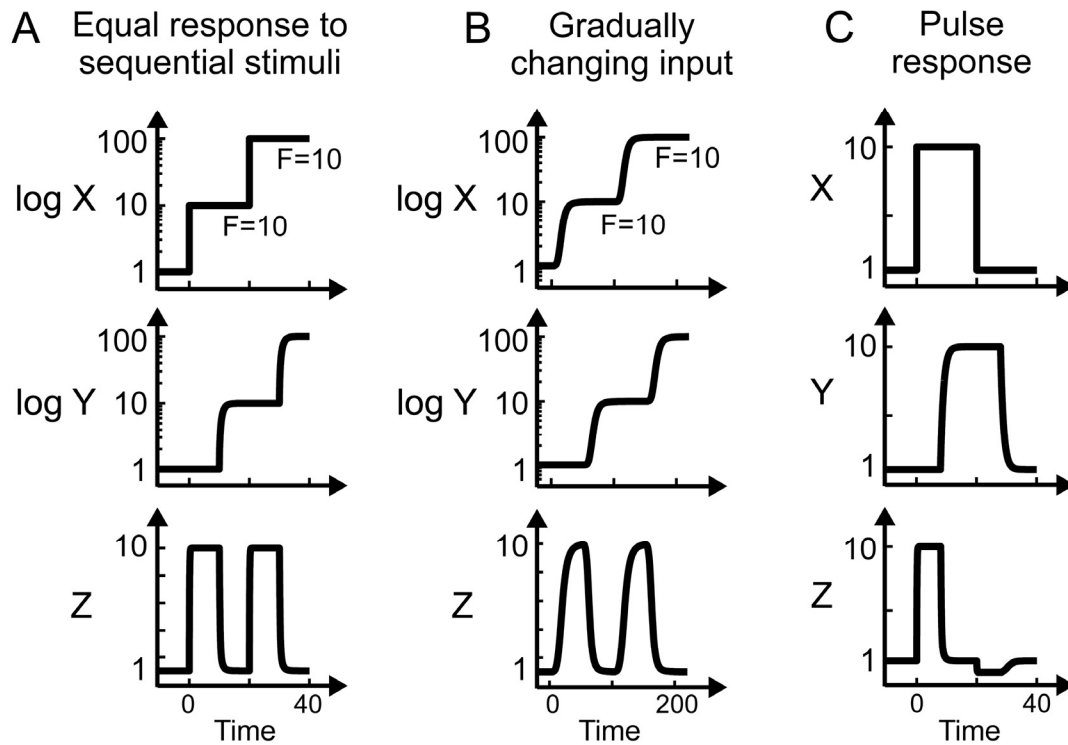

**Figure S1. I1-FFL Shows Fold-Change Detection to Sequential Steps, Gradually Changing Input, and Pulses**

**(A)** The I1-FFL generates identical responses to sequential signal steps with the same fold-change. **(B)** The fold-change detection feature is maintained for any time varying form of input  $X(t)$ . **(C)** The I1-FFL response to a pulse shows an undershoot of  $Z$  dynamics. Pulse signals are often found in biological systems. A pulse-like signal also mimics a situation when after a period of signaling, signal degrades away or is actively removed to prepare cells for the next round of signaling. Removal of signal resets the memory  $Y$  ( $Y$  returns to the basal level).

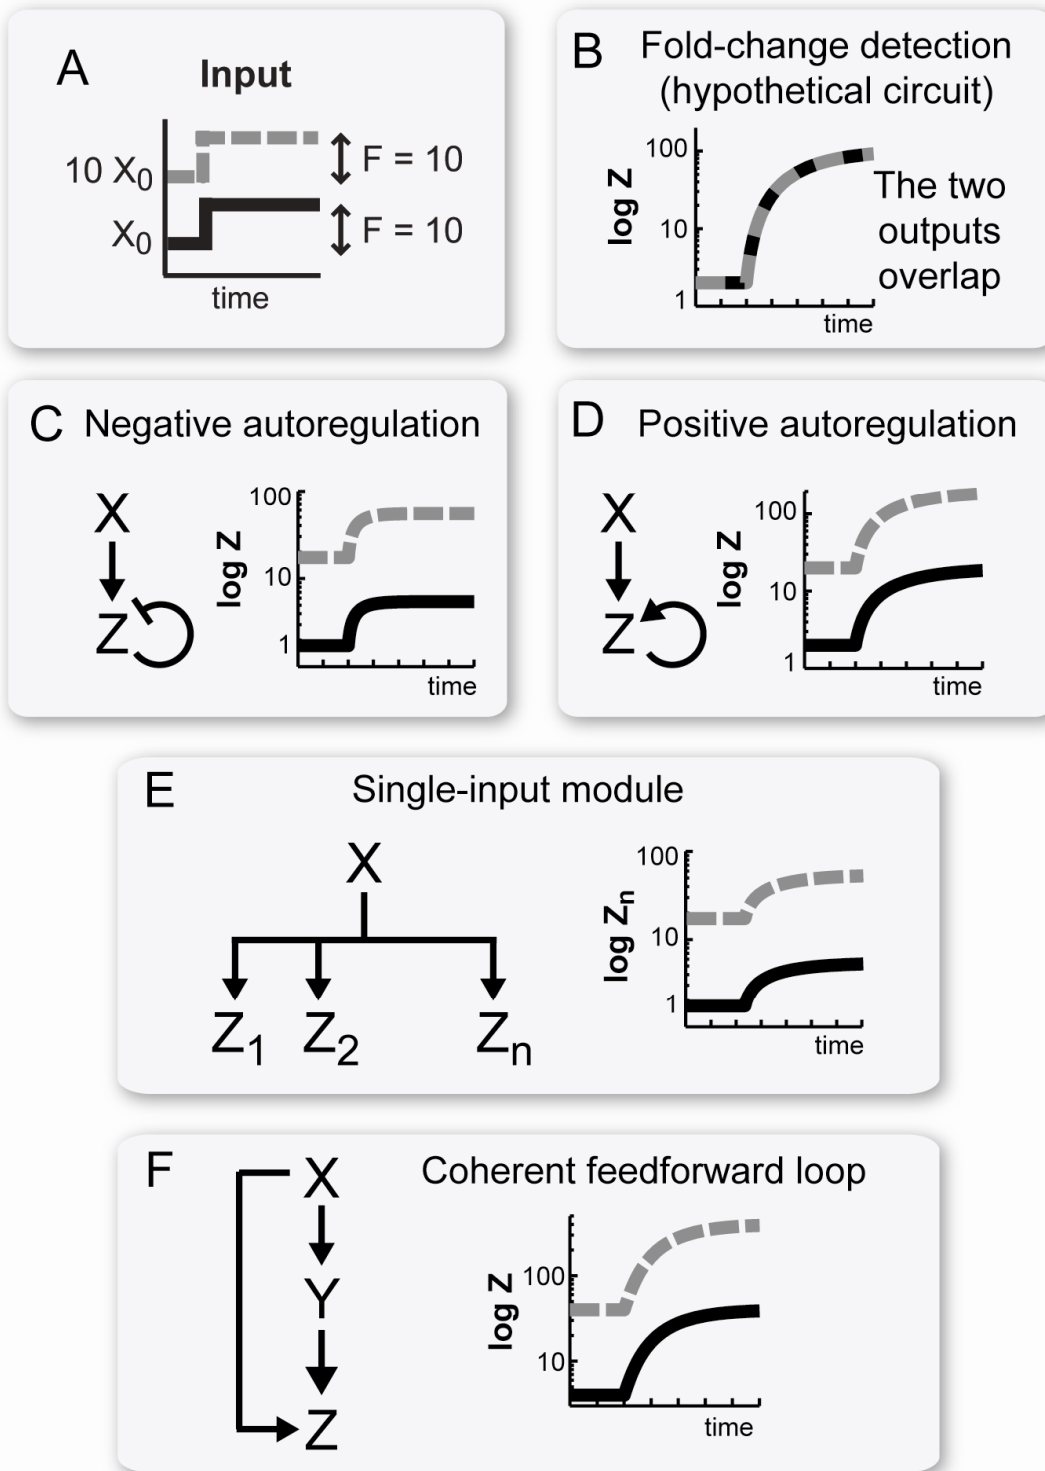

**Figure S2. Other Common Transcriptional Network Motifs Show Response that Depends on the Absolute Levels of the Input**

For illustration purposes, we stimulated network motifs with two step inputs of different absolute levels, but identical fold-changes **(A)**. If a circuit shows a response that depends on the fold-changes in the input, and not the absolute levels of the input, then the outputs to the two step stimuli would perfectly overlap **(B)**. All motifs, except for the incoherent FFLs, do not show fold-change detection: the dynamics and level of Z depends on the absolute level of the activator X.

Intuitively, fold-change detection requires a memory of the basal level of the activator X. Recurrent network motifs such as positive autoregulation, negative autoregulation, and single-input module do not have a distinct component that can act as a memory of X. Consequently, they cannot provide fold-change detection **(C-E)**.

Another motif, the coherent feedforward loop **(F)**, resembles the incoherent feedforward loop, with one difference: the effect of Y on the output Z is of the same sign as the effect of X on Z (*i.e.*, Y activates Z instead of repressing it). This difference abolishes the fold-change detection behavior. Even though Y mimics the level of the activator X (hence acting as a memory of X), it no longer facilitates a temporal comparison between the basal level of X and the new level of X (because Y amplifies, and not opposes, the effects of X).

Mathematically, fold-change detection translates into a structural requirement of how Y appears in the differential equation describing the dynamics of Z.

An I1-FFL with Y promoting degradation of Z

$$\frac{dY}{dt} = \beta_1 X - \alpha_1 Y$$

$$\frac{dZ}{dt} = \beta_2 X - \alpha_2 Y Z$$

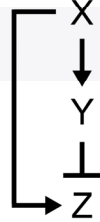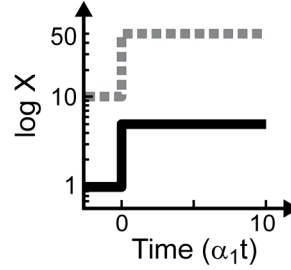

If Y is fast:

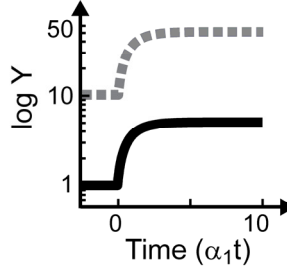

If Y is slow:

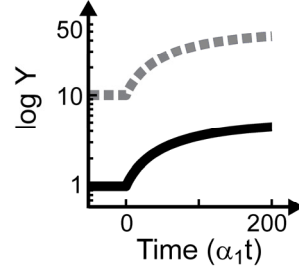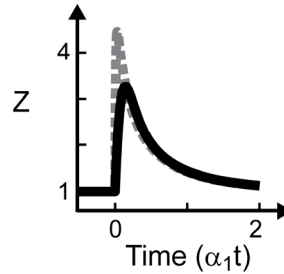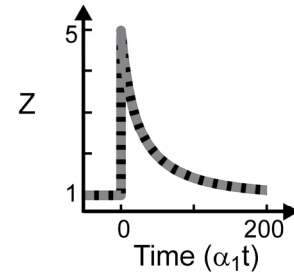

**Figure S3. I1-FFL Connected in a Different Way Can Provide Fold-Change Detection**

An I1-FFL where Y acts by degrading Z, rather than repressing the production of Z, called a “shifter” (Levchenko and Iglesias, 2002; Ma et al., 2009; Tyson et al., 2003) can provide fold-change detection in the limit where the dynamics of Y is very slow or delayed relative to the dynamics of Z. Under this condition, a quasi steady-state prevails: Z is at quasi steady-state, relative to the slow dynamics of Y,

$$Z_{st} = \frac{\beta_2 X}{\alpha_2 Y(t, X)}. \quad \text{Since } Y \text{ also depends on } X, \text{ this cancels out the } X\text{-dependence of}$$

Z. In this limit, at all times, Z responds only to fold-changes in the activator X.

## Analytical solution for the I1-FFL

As derived in Figure 3 in the main text, the dynamic equations for Y and Z are:

$$\frac{dY}{dt} = \beta_1 X - \alpha_1 Y \quad (1)$$

$$\frac{dZ}{dt} = \frac{\beta_2 X}{Y} - \alpha_2 Z \quad (2)$$

Let us define the following dimensionless variables,

$$y = \frac{Y}{\beta_1 X_0 / \alpha_1} \quad (3)$$

$$z = \frac{Z}{\beta_2 \alpha_1 / \beta_1 \alpha_2} \quad (4)$$

$$\tau = \frac{t}{1/\alpha_1} \quad (5)$$

$$f = \frac{X}{X_0} \quad (6)$$

where  $X_0$  is the basal level of X, as depicted in Figure S4. Introducing the dimensionless variables into equations 1-2, we obtain the following dimensionless dynamic equations describing the I1-FFL,

$$\frac{dy}{d\tau} = f - y \quad (7)$$

$$r \frac{dz}{d\tau} = \frac{f}{y} - z \quad (8)$$

where the dimensionless group  $r$  is the ratio of Z and Y lifetimes,

$$r = \frac{\alpha_1}{\alpha_2} \quad (9)$$

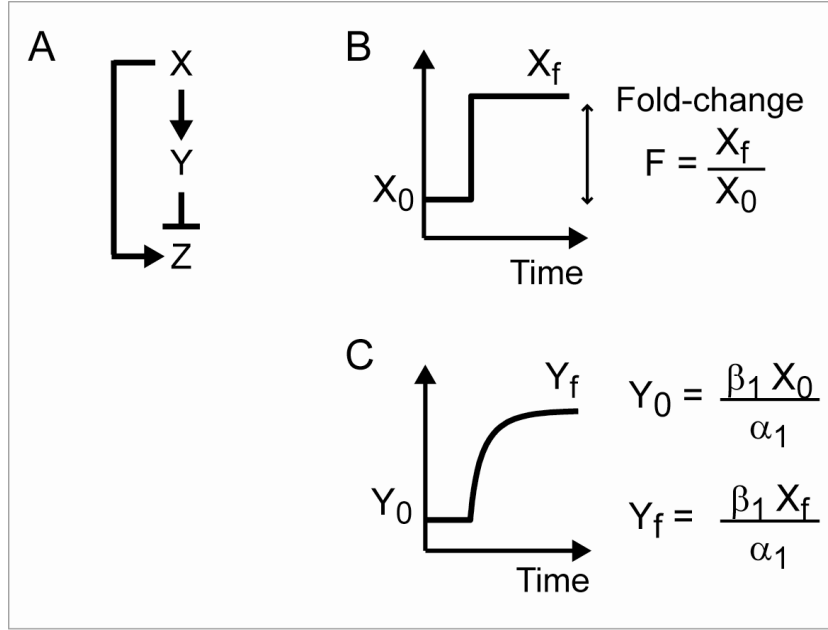

**Figure S4. (A)** The type-1 incoherent feedforward loop (I1-FFL). **(B)** The input to the circuit is the activator X. The **fold-change** in X is defined as the ratio of the new level of X to the previous level of X ( $F = X_f / X_0$ ). **(C)** Y increases to a new steady-state level in response to a step change in the level of X.

Integrating equation 7 with the initial condition  $y(0)=1$ ,

$$y = 1 + (f - 1)(1 - e^{-\tau}) \quad (10)$$

Equation 10 describes how Y changes in time in response to a step increase in the activator X (Figure S4).

Substituting equation 10 into equation 8, we obtain a differential equation describing the dynamics of Z,

$$r \frac{dz}{d\tau} = \frac{f}{1 + (f - 1)(1 - e^{-\tau})} - z \quad (11)$$

Equation 11 can be solved analytically when  $r=1$  ( $\alpha_1=\alpha_2$ ),

$$\frac{dz}{d\tau} = \frac{f}{1+(f-1)(1-e^{-\tau})} - z \quad (12)$$

Integrating equation 12 with the initial condition  $z(0)=1$ ,

$$z = \left[ e^{\tau} + \ln(f e^{\tau} - f + 1) - \frac{1}{f} \ln(f e^{\tau} - f + 1) \right] e^{-\tau} \quad (13)$$

Equation 13 shows that the dynamics of  $Z$ , both during the transient time and steady state, responds only to the fold-changes in  $X$  ( $f$ ), and not on the absolute level of  $X$ .

The profile of  $Z$  is shown in Figure S5.

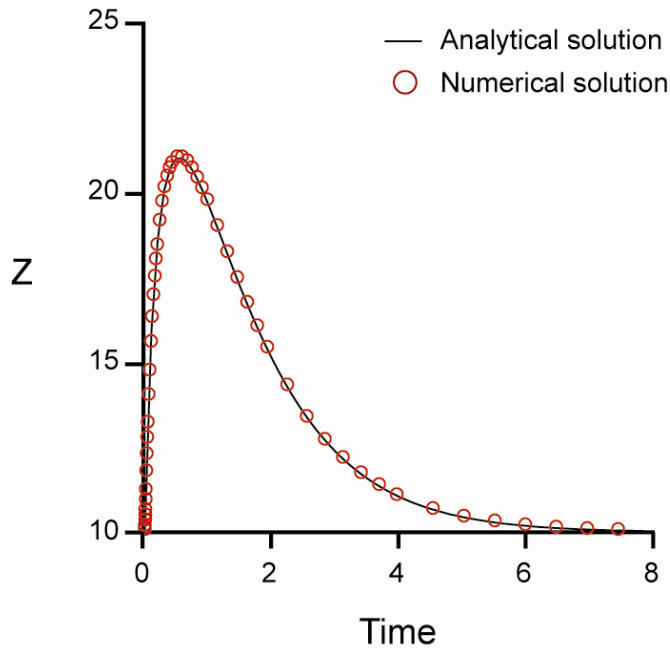

**Figure S5.** The dynamic of  $Z$  in response to a step increase in the activator  $X$ . The solid line depicts the analytical solution (equation 13); the circles depict the numerical solution (equation 2). The parameters used in this plot were:  $\beta_1=1$ ,  $\beta_2=10$ ,  $\alpha_1=\alpha_2=1$ ,



## References

Levchenko, A., and Iglesias, P.A. (2002). Models of eukaryotic gradient sensing: application to chemotaxis of amoebae and neutrophils. *Biophys J* 82, 50-63.

Ma, W., Trusina, A., El-Samad, H., Lim, W.A., and Tang, C. (2009). Defining network topologies that can achieve biochemical adaptation. *Cell* 138, 760-773.

Tyson, J.J., Chen, K.C., and Novak, B. (2003). Sniffers, buzzers, toggles and blinkers: dynamics of regulatory and signaling pathways in the cell. *Curr Opin Cell Biol* 15, 221-231.
